# Supplementary material
Source: publisher site journal article supplement (https://www.dovepress.com/get_supplementary_file.php?f=332215.docx)
Supplement: Supplementary file 1 [file get_supplementary_file.php]

**Appendix A**

**Table A1**The corresponding solution and objectives value of Model1's Pareto optimal solution

| Solutions | Number of new EMS stations | Location of new EMS stations | Obj1 | Obj2 | Obj3 |
| --- | --- | --- | --- | --- | --- |
| #1 |  | 5 | 168319 | 66110 | 700000 |
| #2 |  | 8 | 253831 | 98604 | 750000 |
| #3 |  | 11 | 280721 | 84702 | 750000 |
| #4 |  | 14 | 347542 | 65695 | 750000 |
| #5 |  | 5 | 286162 | 87023 | 700000 |
| #6 |  | 4 | 351116 | 82298 | 600000 |
| #7 |  | 27 | 267869 | 97305 | 750000 |
| #8 |  | 16 | 344371 | 82298 | 650000 |
|  |  |  |  |  |  |
| #9 |  | 8,14 | 235194 | 82001 | 1500000 |
| #10 |  | 13,20 | 245056 | 91840 | 1300000 |
| #11 |  | 11,17 | 262084 | 76751 | 1400000 |
| #12 |  | 15,20 | 294270 | 67943 | 1400000 |
| #13 |  | 5,28 | 271757 | 87023 | 1300000 |
| #14 |  | 3,15 | 336172 | 66110 | 1300000 |
| #15 |  | 4,17 | 332479 | 74347 | 1250000 |
| #16 |  | 4,15 | 332479 | 66110 | 1300000 |
| #17 |  | 5,15 | 267525 | 70834 | 1400000 |
| #18 |  | 14,27 | 249232 | 80702 | 1500000 |
| #19 |  | 15,27 | 249232 | 81117 | 1450000 |
| #20 |  | 11,15 | 262084 | 68513 | 1450000 |
| #21 |  | 1,11 | 239615 | 89519 | 1350000 |
| #22 |  | 11,20 | 227449 | 86535 | 1450000 |
| #23 |  | 11,14 | 262084 | 68098 | 1500000 |
|  |  |  |  |  |  |
| #24 |  | 2,7,8 | 175875 | 95592 | 2250000 |
| #25 |  | 8,14,27 | 198344 | 78558.44 | 2250000 |
| #26 |  | 2,8,20 | 159453 | 102045.7 | 2200000 |
| #27 |  | 2,8,15 | 194088 | 84023.86 | 2200000 |
| #28 |  | 5,12,57 | 198344 | 87638.89 | 2150000 |
| #29 |  | 5,15,20 | 214253 | 72668.03 | 2100000 |
| #30 |  | 9,11,15 | 243906 | 68513.27 | 2100000 |
| #31 |  | 13,17,20 | 185670 | 107015.6 | 2050000 |
| #32 |  | 1,13,20 | 163201 | 117363.3 | 2000000 |
| #33 |  | 5,11,24 | 253831 | 70918.23 | 2050000 |
| #34 |  | 11,15,18 | 262084 | 61969.74 | 2050000 |
| #35 |  | 1,17,27 | 208126 | 94171.65 | 2000000 |
| #36 |  | 15,20,28 | 279865 | 67943.29 | 2000000 |
| #37 |  | 1,5,16 | 223248 | 91839.85 | 1950000 |
| #38 |  | 9,10,24 | 324859 | 68019.32 | 1950000 |

Notes: # means decision-making scheme number.

**Table A2** The corresponding solution and objectives value of Model2's Pareto optimal solution

| Solutions | Number of new EMS stations | Location of new EMS stations | Obj1 | Obj2 | Obj3 |
| --- | --- | --- | --- | --- | --- |
| #1 |  | 5 | 168319 | 135314 | 5005640 |
| #2 |  | 8 | 197448 | 117507 | 5006672 |
| #3 |  | 11 | 210272 | 113922 | 4365360 |
| #4 |  | 5 | 183382 | 131730 | 3862200 |
| #5 |  | 8 | 212511 | 111633 | 3863232 |
| #6 |  | 11 | 233414 | 104347 | 3390640 |
| #7 |  | 5 | 206524 | 122155 | 2887480 |
| #8 |  | 8 | 235653 | 102058 | 2888512 |
| #9 |  | 11 | 251592 | 98712 | 2478880 |
| #10 |  | 5 | 224702 | 115938 | 1975720 |
| #11 |  | 8 | 253831 | 98604 | 1976752 |
| #12 |  | 11 | 280721 | 84702 | 1976752 |
| #13 |  | 8 | 269159 | 92061 | 1293792 |
| #14 |  | 5 | 286162 | 87023 | 1382960 |
| #15 |  | 11 | 313052 | 75545 | 1432960 |
|  |  |  |  |  |  |
| #16 |  | 8,15 | 127874 | 130486 | 7424000 |
| #17 |  | 5,15 | 127874 | 134282 | 6920840 |
| #18 |  | 2,8 | 115843 | 131933 | 6485480 |
| #19 |  | 8,15 | 149682 | 115329 | 6208800 |
| #20 |  | 2,8 | 130906 | 126209 | 5510840 |
| #21 |  | 5,15 | 149682 | 119125 | 5705640 |
| #22 |  | 8,15 | 164745 | 109455 | 5065360 |
| #23 |  | 2,8 | 154048 | 116634 | 4536120 |
| #24 |  | 5,15 | 164745 | 115541 | 4562200 |
| #25 |  | 8,15 | 187887 | 99880 | 4090640 |
| #26 |  | 2,8 | 172226 | 113180 | 3624360 |
| #27 |  | 5,15 | 187887 | 105966 | 3587480 |
| #28 |  | 8,15 | 206065 | 96426 | 3178880 |
| #29 |  | 2,8 | 183596 | 111171 | 2775720 |
| #30 |  | 5,15 | 206065 | 99749 | 2675720 |
| #31 |  | 2,8 | 212725 | 97161 | 2273592 |
| #32 |  | 8,15 | 235194 | 82416 | 2676752 |
| #33 |  | 5,15 | 235194 | 85739 | 2173592 |
| #34 |  | 2,8 | 245056 | 87170 | 2182960 |
| #35 |  | 5,15 | 267525 | 70834 | 2082960 |
|  |  |  |  |  |  |
| #36 |  | 2,5,15 | 75398 | 137899 | 8519480 |
| #37 |  | 3,5,15 | 110176 | 131097.9 | 8200680 |
| #38 |  | 2,5,15 | 97206 | 122742 | 7304280 |
| #39 |  | 3,5,15 | 131984 | 115940.9 | 6985480 |
| #40 |  | 2,5,15 | 112269 | 119158 | 6160840 |
| #41 |  | 2,11,14 | 162301 | 88315 | 5286120 |
| #42 |  | 2,5,15 | 135411 | 109583 | 5186120 |
| #43 |  | 3,5,15 | 170189 | 103307.9 | 5036120 |
| #44 |  | 2,5,15 | 153589 | 103366.1 | 4274360 |
| #45 |  | 2,11,14 | 180479 | 82680.01 | 4374360 |
| #46 |  | 2,11,14 | 191849 | 80671 | 3525720 |
| #47 |  | 2,5,15 | 164959 | 101357 | 3425720 |
| #48 |  | 2,11,14 | 220978 | 66661 | 3023592 |
| #49 |  | 3,5,15 | 210023 | 88223.92 | 3275720 |
| #50 |  | 2,5,15 | 194088 | 87347 | 2923592 |
| #51 |  | 2,5,15 | 226419 | 72442 | 2832960 |
| #52 |  | 3,5,15 | 239152 | 74213.92 | 2773592 |
| #53 |  | 3,5,15 | 253309 | 60550 | 2932960 |
| #54 |  | 3,5,15 | 271483 | 59308.92 | 2682960 |
| #55 |  | 2,11,14 | 271483 | 64291 | 2000000 |

Notes: # means decision-making scheme number.

**Table A3** The corresponding solution and objectives value of Model3's Pareto optimal solution

| Solutions | Number of new EMS stations | Location of new EMS stations | Obj1 | Obj2 | Obj3 |
| --- | --- | --- | --- | --- | --- |
| #1 |  | 5 | 168319 | 127385 | 6989160 |
| #2 |  | 11 | 195867 | 110050 | 6805040 |
| #3 |  | 5 | 183382 | 123801 | 5845720 |
| #4 |  | 8 | 187155 | 12066 | 5440120 |
| #5 |  | 5 | 201560 | 117584 | 4933960 |
| #6 |  | 11 | 228450 | 99143 | 4198720 |
| #7 |  | 11 | 201560 | 113660 | 3745560 |
| #8 |  | 5 | 201560 | 120752 | 3695560 |
| #9 |  | 5 | 224702 | 110338 | 1975720 |
| #10 |  | 5 | 224702 | 115320 | 1292760 |
| #11 |  | 11 | 251592 | 97205 | 1795920 |
| #12 |  | 5 | 253831 | 101310 | 790632 |
| #13 |  | 8 | 253831 | 94935 | 840632 |
| #14 |  | 11 | 280721 | 83195 | 1293792 |
| #15 |  | 5 | 286162 | 86405 | 700000 |
|  |  |  |  |  |  |
| #16 |  | 2,8 | 101438 | 136507 | 9378320 |
| #17 |  | 2,8 | 116501 | 130783 | 8403680 |
| #18 |  | 5,15 | 135082 | 113998 | 7689160 |
| #19 |  | 2,8 | 134679 | 127329 | 7491920 |
| #20 |  | 11,20 | 171724 | 95324 | 7505040 |
| #21 |  | 5,15 | 150145 | 110414 | 6545720 |
| #22 |  | 11,20 | 189902 | 89689 | 6593280 |
| #23 |  | 2,8 | 149084 | 120328 | 5797360 |
| #24 |  | 5,15 | 168323 | 104197 | 5633960 |
| #25 |  | 11,20 | 204307 | 84417 | 4898720 |
| #26 |  | 2,8 | 172226 | 110631 | 4077520 |
| #27 |  | 5,15 | 182923 | 107365 | 4395560 |
| #28 |  | 2,8 | 183596 | 108622 | 3228880 |
| #29 |  | 2,8 | 183596 | 113604 | 2545920 |
| #30 |  | 5,15 | 206065 | 94150 | 2675720 |
| #31 |  | 11,20 | 227449 | 82479 | 2495920 |
| #32 |  | 2,8 | 212725 | 99594 | 2043792 |
| #33 |  | 5,15 | 235194 | 85122 | 1490632 |
| #34 |  | 11,20 | 256578 | 77411 | 1993792 |
| #35 |  | 11,15 | 262084 | 67007 | 1993792 |
|  |  |  |  |  |  |
| #36 |  | 2,8,20 | 77992 | 130225 | 7332870 |
| #37 |  | 2,11,14 | 72841 | 119806 | 9675160 |
| #38 |  | 2,5,15 | 97206 | 114813 | 9287800 |
| #39 |  | 2,11,14 | 87904 | 114082 | 8700520 |
| #40 |  | 2,8,20 | 111233 | 120897 | 5277670 |
| #41 |  | 2,5,15 | 112269 | 111229 | 8144360 |
| #42 |  | 2,11,14 | 106082 | 108447 | 7788760 |
| #43 |  | 2,11,14 | 117452 | 106438 | 6940120 |
| #44 |  | 2,5,15 | 141817 | 103003 | 6383960 |
| #45 |  | 2,8,20 | 77992 | 127057 | 8571270 |
| #46 |  | 2,11,14 | 131857 | 101166 | 5245560 |
| #47 |  | 2,8,20 | 122603 | 118888 | 4429030 |
| #48 |  | 2,5,15 | 164959 | 92589 | 4664120 |
| #49 |  | 2,11,14 | 154999 | 94246 | 3525720 |
| #50 |  | 2,5,15 | 164959 | 95757 | 3425720 |
| #51 |  | 2,8,20 | 159453 | 101428 | 3245958 |
| #52 |  | 2,11,14 | 184128 | 85218 | 2340632 |
| #53 |  | 2,5,15 | 194088 | 86729 | 2240632 |
| #54 |  | 2,5,15 | 226419 | 71824 | 2150000 |
| #55 |  | 2,11,14 | 253309 | 59043 | 2250000 |

Notes: # means decision-making scheme number.
